# Supplementary material for: Electrochemical and diffuse reflectance study on tetrahedral ε-Keggin-based metal–organic frameworks
Source: Royal Society of Chemistry journal article supplement (doi:10.1039/c7ra04771a), 2017-01-01
Supplement: c7ra04771a1.pdf [file c7ra04771a1.pdf]

## Supplementary Information

### The electrochemical and diffuse reflectance study on tetrahedral $\epsilon$ -Keggin-based metal-organic frameworks

Zhong-Bin Nie,<sup>a,c</sup> Min Zhang,<sup>c</sup> Tan Su,<sup>\*b,d</sup> Liang Zhao,<sup>c</sup> Yuan-Yuan Wang,<sup>c</sup> Guang-Yan Sun<sup>\*a</sup> and Zhong-Min Su<sup>c</sup>

a. Faculty of Chemistry, Yanbian University, Yanji 133002, P. R. China. E-mail: gysun@ybu.edu.cn.

b. Laboratory of Theoretical and Computational Chemistry, Institute of Theoretical Chemistry, Jilin University, Changchun 130021, P. R. China. E-mail: sutan\_jlu@jlu.edu.cn.

c. Institute of Functional Material Chemistry and National & Local United Engineering Lab for Power Battery, Department of Chemistry, Northeast Normal University, Changchun 130024, P. R. China.

d. State Key Laboratory of Inorganic Synthesis and Preparative Chemistry, College of Chemistry, Jilin University, Changchun 130012, P. R. China.

## S1. Materials and methods

All chemicals were purchased from commercial sources used as received without further purification. Hydrothermal syntheses of compounds **1** and **2** were carried out in 15 mL polytetrafluoroethylene lined stainless steel containers under autogenous pressure. The infrared spectra were recorded from KBr pellets in the range 4000–400  $\text{cm}^{-1}$  using an Alpha-Centauri spectrometer. XRPD patterns were collected using a Rigaku D/max-II B X-ray diffractometer with graphite monochromatized Cu  $K_{\alpha}$  radiation ( $\lambda = 1.5418 \text{ \AA}$ ) and  $2\theta$  ranging from 5 to 50°. Thermogravimetric analysis (TGA) was performed using a Perkin-Elmer TG-7 analyzer in a temperature range of 20 to 700 °C under nitrogen. XPS analysis was performed on a thermo ECSALAB 250 spectrometer with an Al  $K_{\alpha}$  (1486.6 eV) achromatic X-ray source running at 20 kV. The XPS binding energy (BE) was internally referenced to the aliphatic C(1s) peak (BE, 284.6 eV). The analysis of XPS data was performed using the XPS Peak Fitting Programme version 4.1. Electrochemical measurements and data collection were performed using a CHI 440 electrochemical workstation connected to a personal computer. A conventional three-electrode system was used with an Ag/AgCl electrode as the reference electrode and a Pt wire as the counter electrode. The title compounds-modified glass carbon electrodes (GCEs) were used as the working electrodes. Diffuse reflectivity was measured from 200 to 2000 nm using barium sulfate ( $\text{BaSO}_4$ ) as a standard with 100% reflectance on a Varian Cary 500 UV-Vis spectrophotometer.

## S2. Syntheses

### S2.1 Synthesis of compound **1**

A mixture of  $\text{Na}_2\text{MoO}_4 \cdot 2\text{H}_2\text{O}$  (0.847 g, 3.5 mmol), molybdenum powder 99.99% (0.060 g, 0.62 mmol),  $\text{H}_3\text{PO}_3$  (0.020 g, 0.25 mmol), zinc chloride (0.136 g, 1 mmol), CPBPC (0.238 g, 1 mmol), tetrabutylammonium hydroxide 40 wt% solution in water (120  $\mu\text{L}$ , 0.18 mmol) and  $\text{H}_2\text{O}$  (7 mL) was stirred, and the pH was acidified to 5 with 2 M HCl. Then, the mixture was transferred and sealed in a Teflon-lined stainless steel autoclave at 180 °C for 3 days. After cooling to room temperature at 10 °C $\cdot\text{h}^{-1}$ , dark-red cubic crystals suitable for X-ray diffraction study were collected after filtration (yield 35% based on  $\text{H}_3\text{PO}_3$ ). Elemental analysis: Anal. Calc.: C 30.37; H 3.94; N 1.21; Mo 33.08; Zn 7.52. Found: C 30.01; H 3.65; N 1.39; Mo 33.32; Zn 7.16%.

### S2.2 Synthesis of compound 2

A mixture of  $\text{Na}_2\text{MoO}_4 \cdot 2\text{H}_2\text{O}$  (0.847 g, 3.5 mmol), molybdenum powder 99.99% (0.060 g, 0.62 mmol),  $\text{H}_3\text{PO}_3$  (0.020 g, 0.25 mmol), zinc chloride (0.136 g, 1 mmol), TATAB (0.490 g, 1 mmol), tetrabutylammonium hydroxide 40 wt% solution in water (120  $\mu\text{L}$ , 0.18 mmol) and  $\text{H}_2\text{O}$  (7 mL) was stirred, and the pH was acidified to 5 with 2 M HCl. Then, the mixture was transferred and sealed in a Teflon-lined stainless steel autoclave at 180 °C for 3 days. After cooling to room temperature at 10 °C $\cdot\text{h}^{-1}$ , dark-red cubic crystals suitable for X-ray diffraction study were collected after filtration (16% based on  $\text{H}_3\text{PO}_3$ ). Elemental analysis: Anal. Calc.: C 29.56; H 4.17; N 5.50; Mo 30.15; Zn 6.85. Found: C 29.85; H 3.94; N 5.68; Mo 30.44; Zn 6.63%.

### S3. X-ray crystallography

Single-crystal X-ray diffraction data for **1** and **2** were recorded on a Bruker ApexII CCD diffractometer with graphite-monochromated Mo  $K_\alpha$  radiation ( $\lambda = 0.71073 \text{ \AA}$ ) at 293 K. Absorption corrections were applied by using the multi-scan technique. The structures were solved by the direct method of SHELXS-97 and refined by full matrix least-squares techniques using the SHELXL-97 program within WINGX.<sup>1-3</sup> For compound **2**, TBA<sup>+</sup> cations and water molecules could not be located in the structure due to severe crystallographic disorder, and the data were corrected with SQUEEZE,<sup>4</sup> a part of the PLATON package of crystallographic software used to calculate the solvent molecules or counterions disorder area and to remove the contribution to the overall intensity data. The crystal data and structure refinement results of compounds **1** and **2** were summarized in Table S1.

**Table S1.** Crystal data and structure refinements for compounds **1** and **2**

|                   | <b>1</b>                                                                       | <b>2</b>                                                                           |
|-------------------|--------------------------------------------------------------------------------|------------------------------------------------------------------------------------|
| Empirical formula | $\text{C}_{88}\text{H}_{136}\text{Mo}_{12}\text{N}_3\text{O}_{50}\text{PZn}_4$ | $\text{C}_{46}\text{H}_{32}\text{Mo}_{12}\text{N}_{12}\text{O}_{48}\text{PZn}_4^a$ |
| $M_w$             | 3479.73                                                                        | 2964.57                                                                            |
| Crystal system    | Orthorhombic                                                                   | Monoclinic                                                                         |
| Space group       | $Pbcn$                                                                         | $P2_1/c$                                                                           |
| $a$ (Å)           | 27.391(2)                                                                      | 31.417(3)                                                                          |
| $b$ (Å)           | 32.349(3)                                                                      | 19.788(2)                                                                          |

|                                 |             |            |
|---------------------------------|-------------|------------|
| $c$ (Å)                         | 14.7330(13) | 24.050(2)  |
| $\alpha$ (deg)                  | 90          | 90         |
| $\beta$ (deg)                   | 90          | 100.334(3) |
| $\gamma$ (deg)                  | 90          | 90         |
| $V$ (Å <sup>3</sup> )           | 13054(2)    | 14709(3)   |
| $Z$                             | 4           | 4          |
| $D_c$ (Mg·m <sup>-3</sup> )     | 1.770       | 1.339      |
| Abs. coeff. (mm <sup>-1</sup> ) | 1.919       | 1.691      |
| $R_{\text{int}}$                | 0.0825      | 0.0893     |
| $F(000)$                        | 6896        | 5660       |
| reflns collected                | 94053       | 368233     |
| Independent reflns              | 16307       | 26043      |
| GOF on $F^2$                    | 1.069       | 1.037      |
| $R_1 [I > 2\sigma(I)]^b$        | 0.0714      | 0.0982     |
| $wR_2 [I > 2\sigma(I)]^b$       | 0.1993      | 0.2308     |
| $R_1$ (all data) <sup>c</sup>   | 0.1317      | 0.1147     |
| $wR_2$ (all data) <sup>c</sup>  | 0.2534      | 0.2404     |

<sup>a</sup> The TBA<sup>+</sup> ions and water molecules in the crystal structure of **2** omitted for clarity. The chemical formula of compound **2** is determined as [TBA]<sub>3</sub>[PMo<sup>V</sup><sub>8</sub>Mo<sup>VI</sup><sub>4</sub>O<sub>37</sub>(OH)<sub>3</sub>Zn<sub>4</sub>][PTABAB][HPTABAB]·7H<sub>2</sub>O.

<sup>b</sup>  $R_1 = \Sigma||F_o| - |F_c||/\Sigma|F_o|$ . <sup>c</sup>  $wR_2 = |\Sigma w(|F_o|^2 - |F_c|^2)|/\Sigma|w(F_o^2)|^{1/2}$ .

**Table S2.** The valence bond calculations for compounds **1** and **2**<sup>5</sup>

| Compound 1 |       | Compound 2 |       |      |       |
|------------|-------|------------|-------|------|-------|
| P1         | 4.698 | P1         | 4.447 |      |       |
| Zn1        | 2.001 | Zn1        | 2.047 | Zn3  | 1.950 |
| Zn2        | 2.023 | Zn2        | 2.079 | Zn4  | 1.996 |
| Mo1        | 5.132 | Mo1        | 5.304 | Mo7  | 6.011 |
| Mo2        | 5.123 | Mo2        | 5.075 | Mo8  | 5.923 |
| Mo3        | 5.975 | Mo3        | 5.842 | Mo9  | 4.881 |
| Mo4        | 5.274 | Mo4        | 5.848 | Mo10 | 5.200 |
| Mo5        | 5.814 | Mo5        | 5.373 | Mo11 | 5.274 |

|                         |       |     |                         |      |       |
|-------------------------|-------|-----|-------------------------|------|-------|
| Mo6                     | 5.147 | Mo6 | 5.238                   | Mo12 | 5.096 |
|                         |       |     |                         |      |       |
| Compound 1 <sup>a</sup> |       |     | Compound 2 <sup>a</sup> |      |       |
| O7                      | 1.379 | O7  | 1.922                   | O15  | 1.902 |
| O8                      | 2.098 | O8  | 2.014                   | O20  | 1.921 |
| O10                     | 2.021 | O9  | 2.021                   | O21  | 2.050 |
| O15                     | 2.066 | O10 | 1.905                   | O22  | 1.995 |
| O16                     | 2.000 | O11 | 1.276                   | O25  | 1.238 |
| O19                     | 1.403 | O14 | 1.819                   | O26  | 2.025 |

<sup>a</sup> Only the results for  $\mu_2$ -O centers of the POM units are listed in the Table.

## S4. Supporting figures

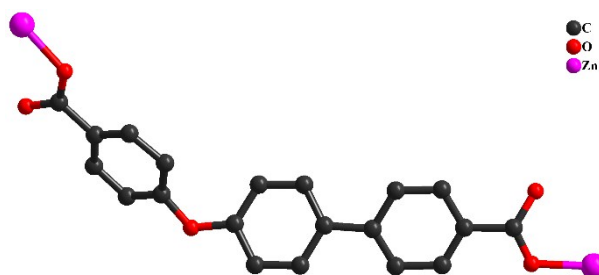

**Fig. S1** The coordination mode of CPBPC fragment in compound **1**.

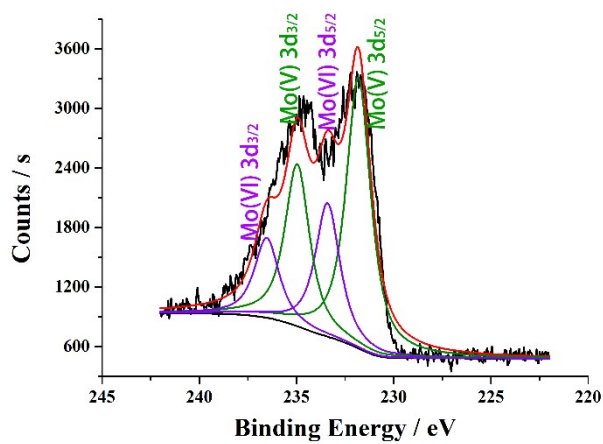

**Fig. S2** The XPS analysis of Mo element in compound **1**.

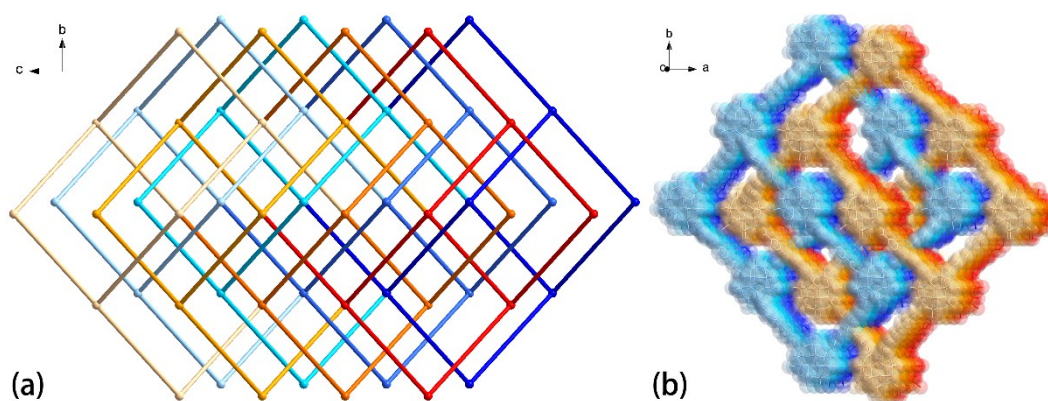

**Fig. S3** The structure of **1**: (a) the 3D spacefill mode and (b) the schematic view of the [4+4] interpenetrated topology in the *a*-axis direction.

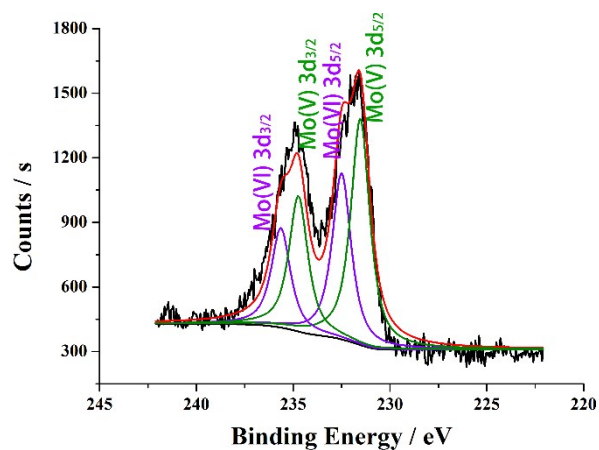

**Fig. S4** The XPS analysis of Mo element in compound **2**.

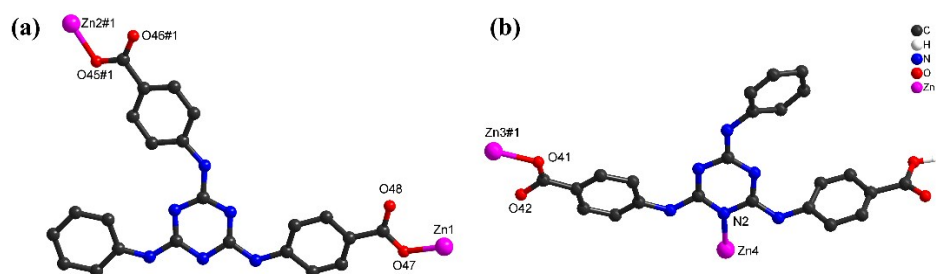

**Fig. S5** The coordination modes of two distinct PTABAB fragments in compound **2**.

(a) Symmetry code: #1:  $x, y, -1+z$ . (b) Symmetry code: #1:  $-x, -1/2+y, 1/2-z$ .

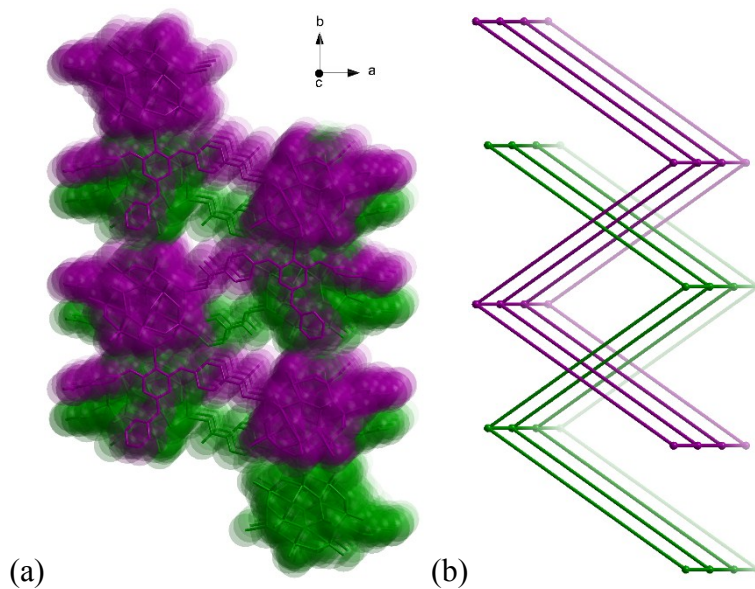

**Fig. S6** The two-fold interpenetrated structure (a) and topology (b) between adjacent layers in compound **2** along the indicated direction.

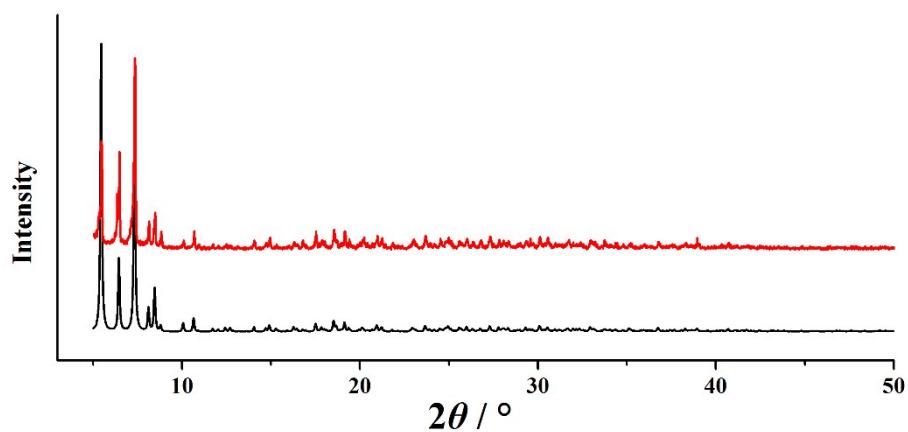

**Fig. S7** The PXRD patterns of **1**: simulated pattern (*black*) and as-synthesized sample (*red*), respectively.

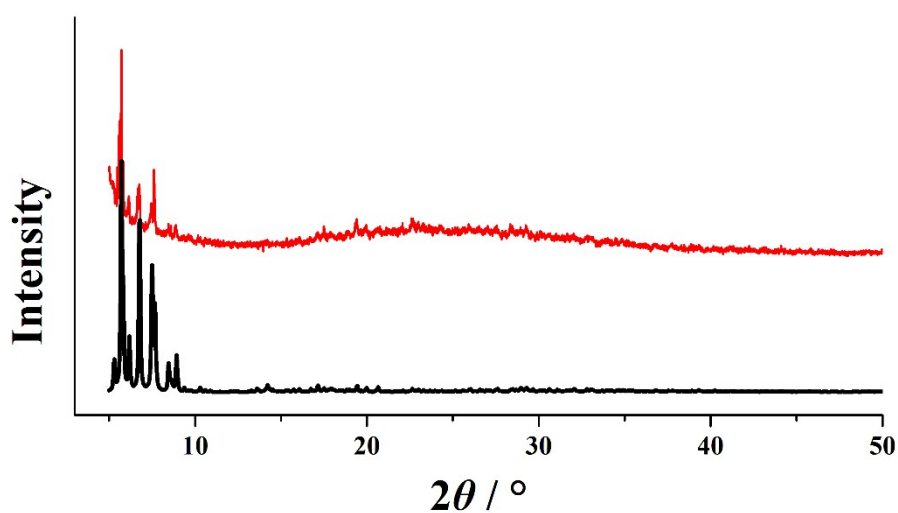

**Fig. S8** The PXRD patterns of **2**: simulated pattern (*black*) and as-synthesized sample (*red*), respectively.

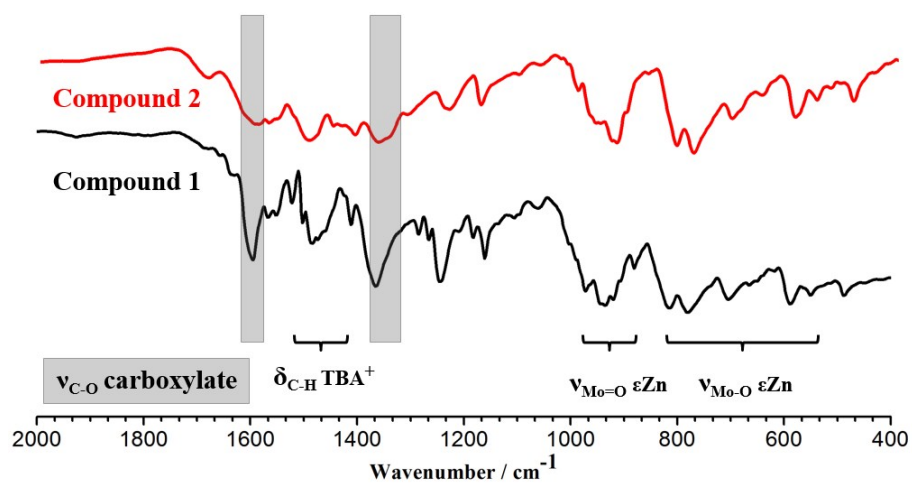

**Fig. S9** The IR spectra of compounds **1** and **2** in KBr pellets.



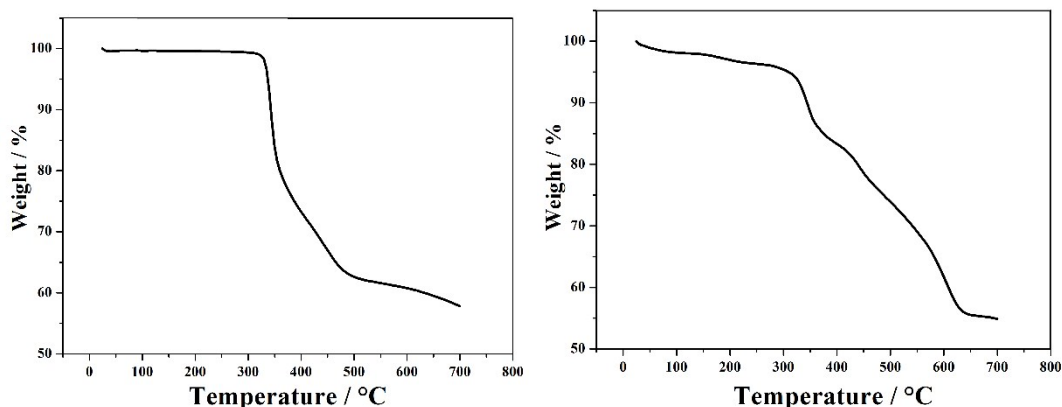

**Fig. S10** The TGA curve of **1** (left) and **2** (right) measured under  $N_2$  atmosphere from room temperature to  $700\text{ }^\circ\text{C}$  at a heating rate of  $5\text{ }^\circ\text{C}\cdot\text{min}^{-1}$ .

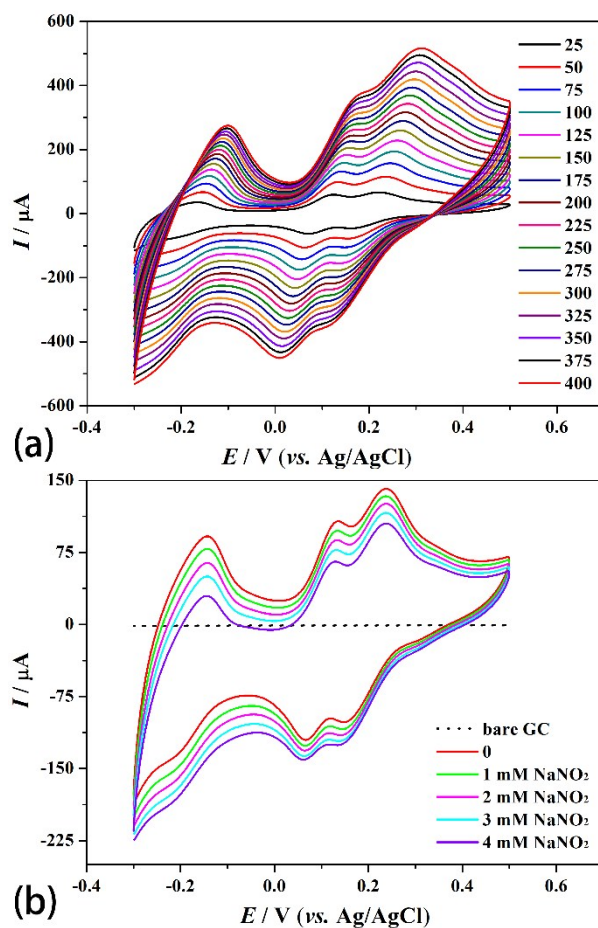

**Fig. S11** The cyclic voltammograms of **1**-GCE measured in  $0.1\text{ mol}\cdot\text{L}^{-1}\text{ H}_2\text{SO}_4$  aqueous solution (a) at different scan rates ( $\text{mV}\cdot\text{s}^{-1}$ ) and (b) at the scan rate of  $50\text{ mV}\cdot\text{s}^{-1}$  containing different concentrations of  $\text{NaNO}_2$ , respectively.

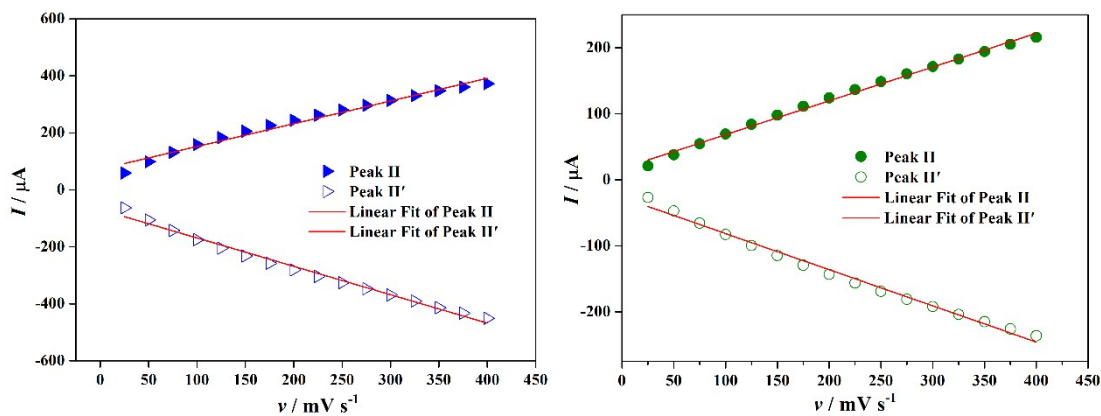

**Fig. S12** The plots and linear fits of the anodic and the cathodic peaks current against scan rates for 1- (left) and 2-GCE (right), respectively.

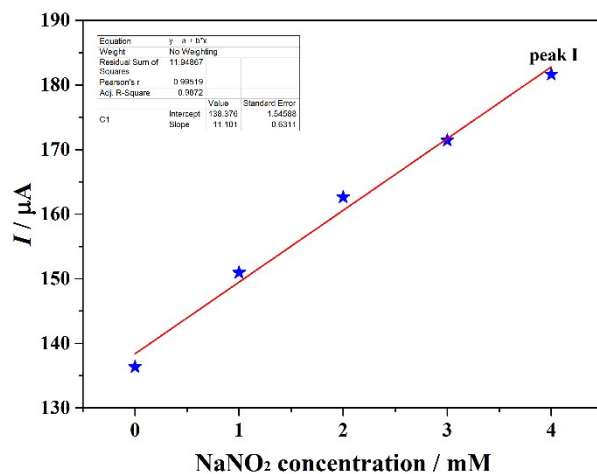

**Fig. S13** The plot and linear fit of the catalytic peak currents as a function of NaNO<sub>2</sub> concentrations for 1-GCE.

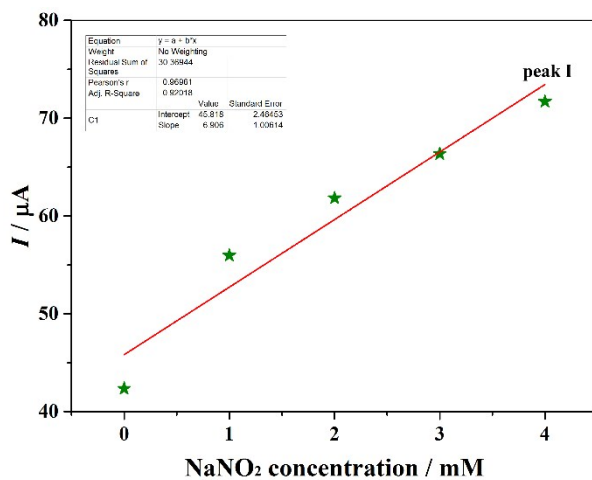

**Fig. S14** The plot and linear fit of the catalytic peak currents as a function of NaNO<sub>2</sub> concentrations for 2-GCE.

## References

- 1 G. M. Sheldrick, *SHELXS-97*, Programs for X-ray Crystal Structure Solution, University of Göttingen: Göttingen, Germany, 1997.
- 2 G. M. Sheldrick, *SHELXL-97*, Programs for X-ray Crystal Structure Refinement, University of Göttingen: Göttingen, Germany, 1997.
- 3 L. J. Farrugia, *WINGX*, A Windows Program for Crystal Structure Analysis, University of Glasgow; Glasgow, UK, 1988.
- 4 P. van der Sluis and A. L. Spek, *Acta Crystallogr., Sect. A*, 1990, **46**, 194.
- 5 N. E. Brese and M. O'Keeffe, *Acta Cryst.*, 1991, **B47**, 192.
